# Supplementary material for: Ten-year patient-reported outcomes following total and minimally invasive unicompartmental knee arthroplasty: a propensity score-matched cohort analysis
Source: Springer Nature journal article supplement (doi:10.1007/s00167-016-4404-7), 2016-12-29
Supplement: MOESM1 [file 11964486]

APPENDIX 1

**Table A.1.1. Comparison of ineligible and eligible TKR**

| TKR                                 | All                 | Missing       | Excluded            | Eligible            | P value |
|-------------------------------------|---------------------|---------------|---------------------|---------------------|---------|
| N                                   | 2,252               | 2252          | 272                 | 1,980               |         |
| Age (mean, SD)                      | 70.59 (8.31)        | 0 (0%)        | 71.93 (9.17)        | 70.40 (8.17)        | 0.009*  |
| Gender (male, %)                    | 981 (44%)           | 0 (0%)        | 117 (43%)           | 864 (44%)           | 0.846†  |
| Pre-op OKS (mean, SD)               | 17.97 (7.53)        | 121 (5.37%)   | 15.21 (7.34)        | 18.18 (7.50)        | <0.001* |
| Post-op OKS year 1 (median, IQR)    | 36 (28 to 42)       | 558 (24.78%)  | 33.5 (25.25 to 42)  | 36 (28 to 42)       | 0.276‡  |
| Post-op OKS year 2 (median, IQR)    | 38 (28 to 43)       | 707 (31.39%)  | 38 (28.25 to 42)    | 38 (28 to 43)       | 0.78‡   |
| Post-op OKS year 3 (median, IQR)    | 37 (28 to 43)       | 643 (28.55%)  | 38 (30 to 44)       | 37 (28 to 43)       | 0.482‡  |
| Post-op OKS year 4 (median, IQR)    | 37 (27 to 43)       | 655 (29.09%)  | 39.0 (29 to 44)     | 36 (27 to 43)       | 0.219‡  |
| Post-op OKS year 5 (median, IQR)    | 37 (28 to 43)       | 741 (32.9%)   | 39 (28 to 44)       | 37 (28 to 43)       | 0.296‡  |
| Post-op OKS year 6 (median, IQR)    | 37 (28 to 43)       | 838 (37.21%)  | 39 (31 to 43)       | 37 (28 to 43)       | 0.343‡  |
| Post-op OKS year 7 (median, IQR)    | 37 (27 to 43)       | 912 (40.5%)   | 37 (30 to 41.75)    | 37 (27 to 43)       | 0.766‡  |
| Post-op OKS year 8 (median, IQR)    | 36 (27 to 43)       | 989 (43.92%)  | 37 (28 to 41)       | 36 (27 to 43)       | 0.78‡   |
| Post-op OKS year 9 (median, IQR)    | 36 (27 to 43)       | 1105 (49.07%) | 36.0 (30 to 42)     | 36 (27 to 43)       | 0.528‡  |
| Post-op OKS year 10 (median, IQR)   | 36 (26 to 43)       | 1316 (58.44%) | 35 (27 to 42)       | 36.0 (26 to 43)     | 0.684‡  |
| Pre-op EQ-5D (median, IQR)          | 0.41 (0.16 to 0.59) | 121 (5.37%)   | 0.23 (0.07 to 0.51) | 0.43 (0.16 to 0.6)  | <0.001‡ |
| Post-op EQ-5D year 1 (median, IQR)  | 0.73 (0.62 to 0.86) | 558 (24.78%)  | 0.72 (0.59 to 0.85) | 0.73 (0.62 to 0.86) | 0.379‡  |
| Post-op EQ-5D year 2 (median, IQR)  | 0.75 (0.62 to 0.88) | 707 (31.39%)  | 0.74 (0.62 to 0.86) | 0.75 (0.62 to 0.88) | 0.558‡  |
| Post-op EQ-5D year 3 (median, IQR)  | 0.75 (0.62 to 0.88) | 643 (28.55%)  | 0.77 (0.63 to 0.89) | 0.75 (0.62 to 0.88) | 0.646‡  |
| Post-op EQ-5D year 4 (median, IQR)  | 0.73 (0.61 to 0.88) | 655 (29.09%)  | 0.75 (0.65 to 0.91) | 0.73 (0.61 to 0.88) | 0.262‡  |
| Post-op EQ-5D year 5 (median, IQR)  | 0.74 (0.61 to 0.89) | 741 (32.9%)   | 0.76 (0.62 to 0.92) | 0.73 (0.61 to 0.88) | 0.239‡  |
| Post-op EQ-5D year 6 (median, IQR)  | 0.74 (0.61 to 0.88) | 838 (37.21%)  | 0.75 (0.63 to 0.89) | 0.74 (0.61 to 0.88) | 0.628‡  |
| Post-op EQ-5D year 7 (median, IQR)  | 0.73 (0.61 to 0.88) | 912 (40.5%)   | 0.74 (0.64 to 0.91) | 0.73 (0.61 to 0.88) | 0.418‡  |
| Post-op EQ-5D year 8 (median, IQR)  | 0.71 (0.6 to 0.87)  | 989 (43.92%)  | 0.72 (0.64 to 0.83) | 0.71 (0.6 to 0.87)  | 0.919‡  |
| Post-op EQ-5D year 9 (median, IQR)  | 0.71 (0.59 to 0.87) | 1105 (49.07%) | 0.72 (0.63 to 0.86) | 0.71 (0.59 to 0.87) | 0.741‡  |
| Post-op EQ-5D year 10 (median, IQR) | 0.71 (0.59 to 0.87) | 1316 (58.44%) | 0.69 (0.58 to 0.84) | 0.71 (0.59 to 0.87) | 0.626‡  |

TKR: total knee replacement. \*t-test †Chi 2 ‡Wilcoxon rank-sum test.

**Table A.1.2. Comparison of ineligible and eligible UKR**

| UKR                                 | All                 | Missing     | Excluded            | Eligible            | P value |
|-------------------------------------|---------------------|-------------|---------------------|---------------------|---------|
| N                                   | 1,000               | 1000        | 325                 | 675                 |         |
| Age (mean, SD)                      | 66.59 (9.63)        | 0 (0%)      | 66.11 (9.78)        | 66.82 (9.56)        | 0.276*  |
| Gender (male, %)                    | 513 (51%)           | 0 (0%)      | 163 (50%)           | 350 (52%)           | 0.615†  |
| Pre-op OKS (mean, SD)               | 24.68 (8.77)        | 308 (30.8%) | 28.35 (11.28)       | 24.59 (8.69)        | 0.19*   |
| Post-op OKS year 1 (median, IQR)    | 43 (38 to 46)       | 237 (23.7%) | 43.0 (38 to 46)     | 43 (38 to 46)       | 0.756‡  |
| Post-op OKS year 2 (median, IQR)    | 44 (38 to 46)       | 512 (51.2%) | 44 (37.5 to 46)     | 43 (38 to 46)       | 0.895‡  |
| Post-op OKS year 3 (median, IQR)    | 44 (39 to 47)       | 691 (69.1%) | 44 (38.75 to 47)    | 44 (39 to 47)       | 0.525‡  |
| Post-op OKS year 4 (median, IQR)    | 44 (39 to 47)       | 729 (72.9%) | 44.5 (39 to 47)     | 44 (40 to 47)       | 0.816‡  |
| Post-op OKS year 5 (median, IQR)    | 44 (39 to 47)       | 190 (19%)   | 44 (38 to 46.5)     | 44 (39 to 47)       | 0.53‡   |
| Post-op OKS year 6 (median, IQR)    | 44 (38 to 47)       | 698 (69.8%) | 43 (35.25 to 46)    | 44 (39 to 47)       | 0.122‡  |
| Post-op OKS year 7 (median, IQR)    | 44 (38 to 47)       | 365 (36.5%) | 44 (38 to 47)       | 44 (39 to 47)       | 0.63‡   |
| Post-op OKS year 8 (median, IQR)    | 44 (36 to 47)       | 817 (81.7%) | 45 (37 to 47)       | 44 (35 to 47)       | 0.471‡  |
| Post-op OKS year 9 (median, IQR)    | 43 (34.5 to 47)     | 825 (82.5%) | 41.5 (35.25 to 46)  | 44 (34 to 47)       | 0.301‡  |
| Post-op OKS year 10 (median, IQR)   | 43 (36 to 47)       | 545 (54.5%) | 43 (36.5 to 47)     | 42.5 (35.75 to 47)  | 0.642‡  |
| Pre-op EQ-5D (median, IQR)          | 0.61 (0.37 to 0.68) | 309 (30.9%) | 0.66 (0.34 to 0.71) | 0.61 (0.37 to 0.68) | 0.507‡  |
| Post-op EQ-5D year 1 (median, IQR)  | 0.87 (0.76 to 0.93) | 294 (29.4%) | 0.87 (0.77 to 0.92) | 0.87 (0.76 to 0.93) | 0.534‡  |
| Post-op EQ-5D year 2 (median, IQR)  | 0.89 (0.77 to 0.94) | 560 (56%)   | 0.90 (0.78 to 0.94) | 0.89 (0.77 to 0.94) | 0.424‡  |
| Post-op EQ-5D year 3 (median, IQR)  | 0.90 (0.79 to 0.94) | 726 (72.6%) | 0.91 (0.78 to 0.94) | 0.89 (0.79 to 0.93) | 0.393‡  |
| Post-op EQ-5D year 4 (median, IQR)  | 0.88 (0.77 to 0.94) | 802 (80.2%) | 0.89 (0.78 to 0.94) | 0.88 (0.77 to 0.93) | 0.675‡  |
| Post-op EQ-5D year 5 (median, IQR)  | 0.89 (0.77 to 0.93) | 243 (24.3%) | 0.88 (0.77 to 0.93) | 0.89 (0.78 to 0.94) | 0.451‡  |
| Post-op EQ-5D year 6 (median, IQR)  | 0.88 (0.74 to 0.94) | 793 (79.3%) | 0.88 (0.73 to 0.93) | 0.89 (0.75 to 0.94) | 0.34‡   |
| Post-op EQ-5D year 7 (median, IQR)  | 0.90 (0.76 to 0.94) | 391 (39.1%) | 0.89 (0.75 to 0.93) | 0.90 (0.76 to 0.94) | 0.31‡   |
| Post-op EQ-5D year 8 (median, IQR)  | 0.91 (0.72 to 0.94) | 847 (84.7%) | 0.92 (0.75 to 0.94) | 0.90 (0.71 to 0.93) | 0.269‡  |
| Post-op EQ-5D year 9 (median, IQR)  | 0.81 (0.68 to 0.93) | 877 (87.7%) | 0.82 (0.71 to 0.92) | 0.80 (0.67 to 0.93) | 0.919‡  |
| Post-op EQ-5D year 10 (median, IQR) | 0.84 (0.69 to 0.93) | 645 (64.5%) | 0.82 (0.68 to 0.93) | 0.84 (0.69 to 0.94) | 0.79‡   |

UKR: unicompartmental knee replacement. \*t-test †Chi 2 ‡Wilcoxon rank-sum test.

Figure A.1.1. Oxford Knee Score of eligible and excluded patients

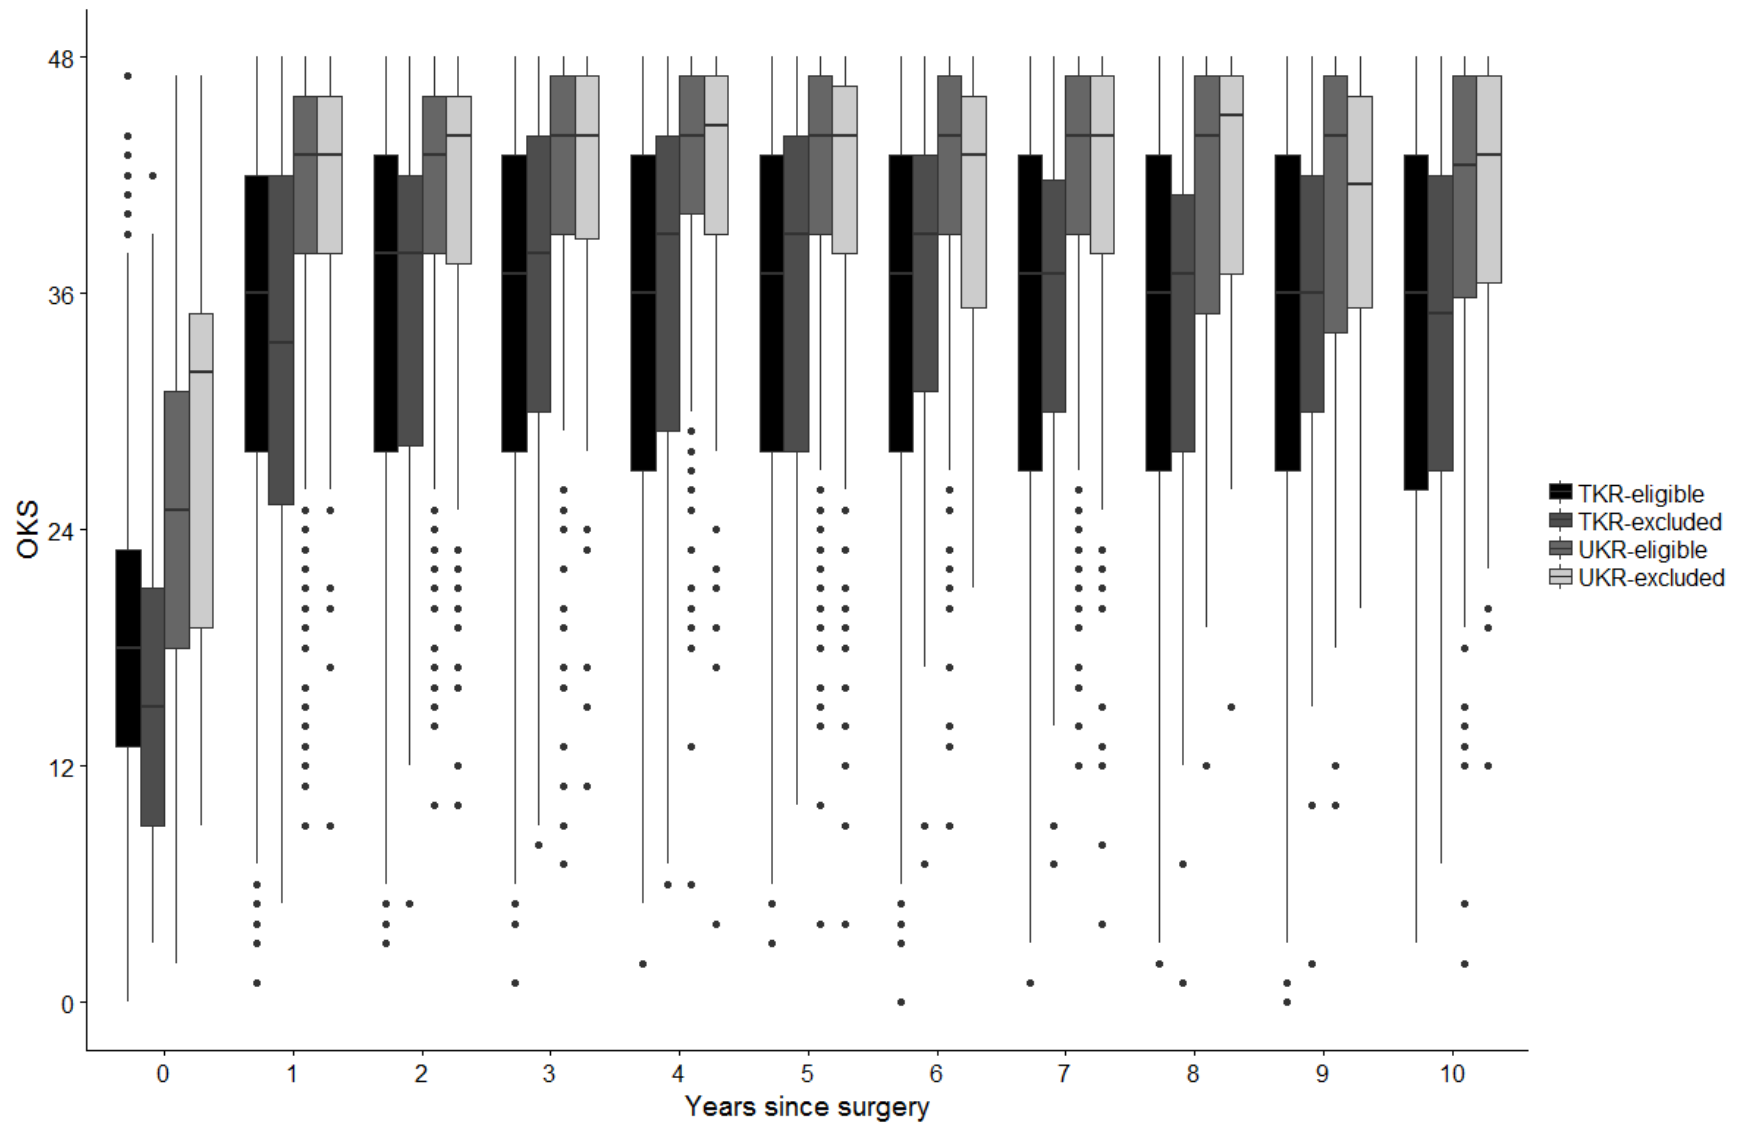

Figure A.1.2. Mapped EQ-5D of eligible and excluded patients

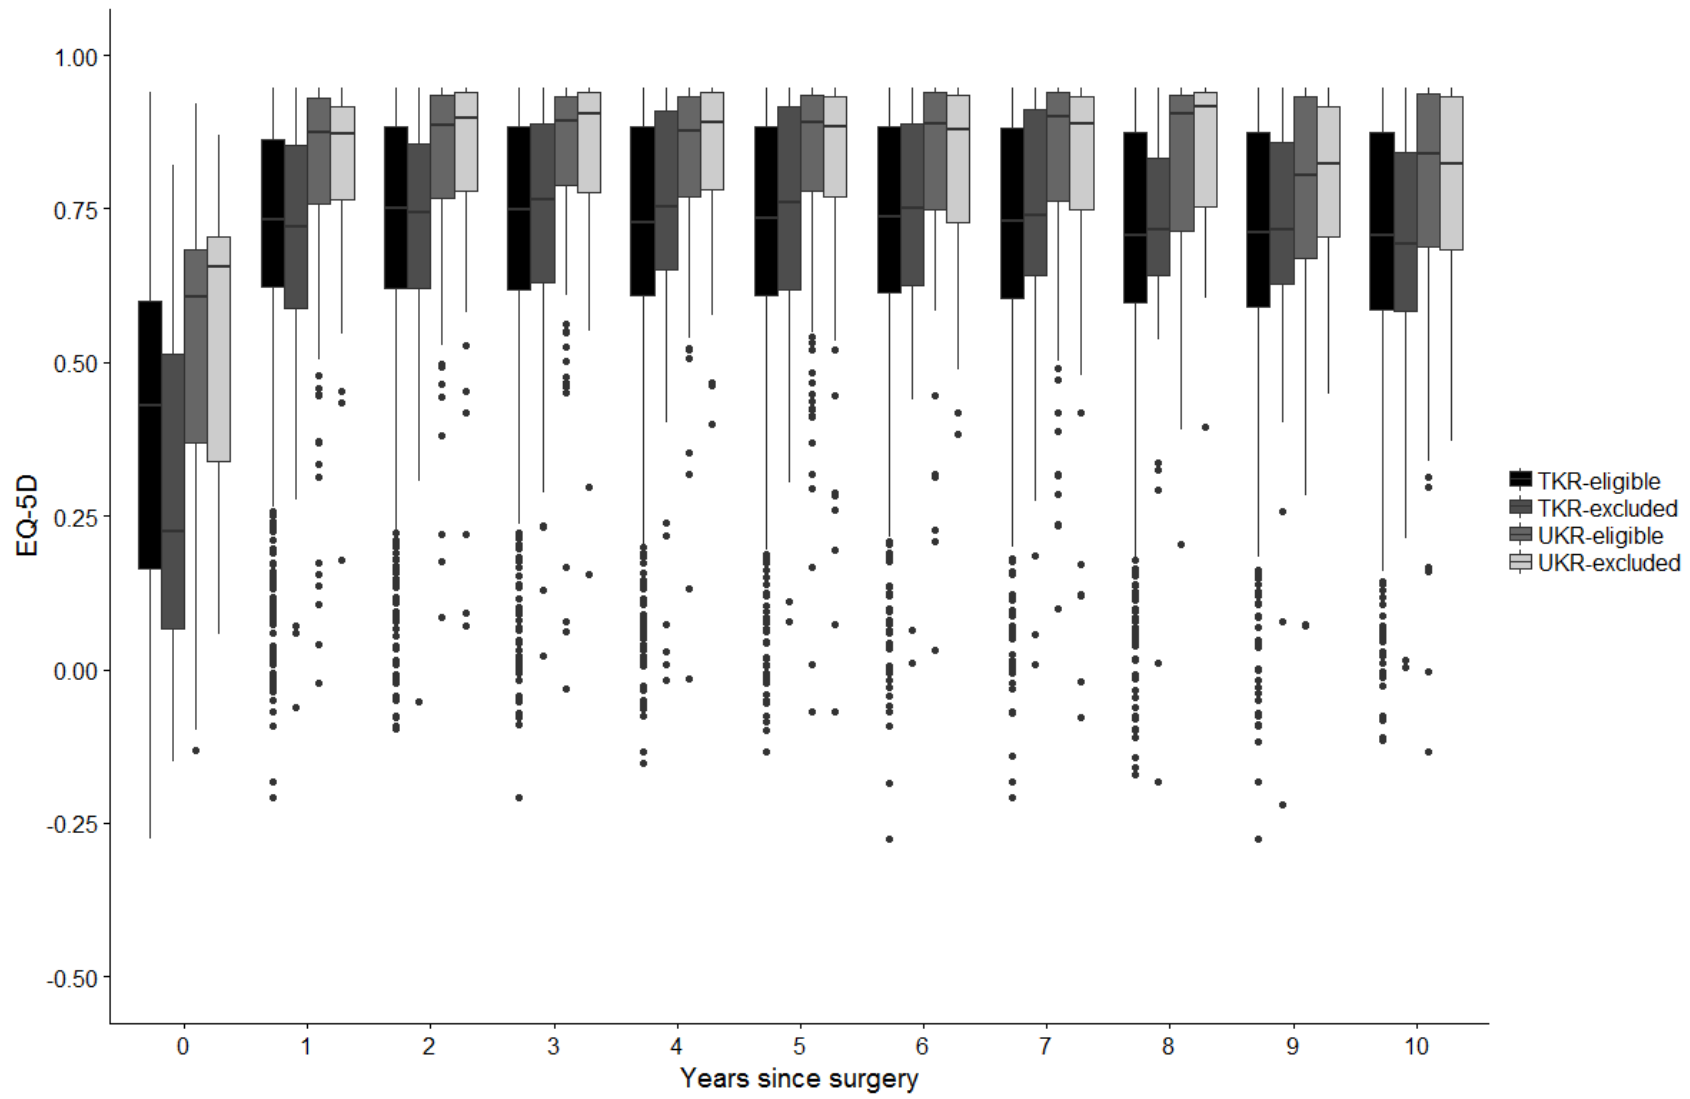

APPENDIX 2

**Table A.2.1. Observed patient-reported outcomes. Mean values with 95% bootstrapped confidence intervals.**

| Year | OKS pain component     |                        | OKS function component |                        | OKS                    |                        | Mapped EQ-5D        |                     |
|------|------------------------|------------------------|------------------------|------------------------|------------------------|------------------------|---------------------|---------------------|
|      | TKR                    | UKR                    | TKR                    | UKR                    | TKR                    | UKR                    | TKR                 | UKR                 |
| 1    | 22.02 (21.49 to 22.52) | 23.82 (23.33 to 24.22) | 14.14 (13.76 to 14.5)  | 16.47 (16.15 to 16.74) | 35.89 (35.01 to 36.75) | 40.26 (39.52 to 40.95) | 0.74 (0.72 to 0.76) | 0.82 (0.8 to 0.83)  |
| 2    | 22.73 (22.23 to 23.27) | 24.27 (23.65 to 24.84) | 14.34 (13.94 to 14.72) | 16.5 (16.05 to 16.89)  | 36.83 (35.84 to 37.74) | 40.62 (39.62 to 41.46) | 0.76 (0.74 to 0.77) | 0.83 (0.81 to 0.84) |
| 3    | 22.42 (21.87 to 22.93) | 24.21 (23.3 to 24.92)  | 14.21 (13.8 to 14.63)  | 16.28 (15.69 to 16.8)  | 36.39 (35.43 to 37.28) | 40.25 (38.93 to 41.38) | 0.75 (0.73 to 0.77) | 0.82 (0.79 to 0.85) |
| 4    | 22.33 (21.76 to 22.84) | 24.17 (23.24 to 24.93) | 13.94 (13.52 to 14.35) | 16.32 (15.65 to 16.91) | 36.06 (35.05 to 36.96) | 40.94 (39.55 to 42.03) | 0.74 (0.72 to 0.76) | 0.82 (0.79 to 0.84) |
| 5    | 22.53 (21.98 to 23.07) | 24.38 (23.94 to 24.79) | 14.08 (13.64 to 14.47) | 16.48 (16.15 to 16.77) | 36.41 (35.48 to 37.33) | 41.01 (40.29 to 41.66) | 0.75 (0.73 to 0.77) | 0.83 (0.81 to 0.84) |
| 6    | 22.55 (21.98 to 23.09) | 23.92 (22.78 to 24.85) | 14.52 (14.05 to 14.91) | 16.33 (15.51 to 17.02) | 37.03 (36.09 to 37.93) | 40.64 (39.34 to 41.76) | 0.76 (0.74 to 0.78) | 0.81 (0.77 to 0.84) |
| 7    | 22.39 (21.78 to 22.96) | 24.76 (24.26 to 25.19) | 14.14 (13.7 to 14.57)  | 16.3 (15.92 to 16.64)  | 36.42 (35.35 to 37.32) | 40.98 (40.2 to 41.71)  | 0.75 (0.73 to 0.77) | 0.83 (0.81 to 0.84) |
| 8    | 22.41 (21.75 to 22.97) | 24.05 (22.93 to 24.99) | 13.8 (13.35 to 14.24)  | 16.19 (15.38 to 16.93) | 36.05 (35.08 to 37.08) | 40.32 (38.73 to 41.75) | 0.74 (0.72 to 0.76) | 0.81 (0.78 to 0.84) |
| 9    | 22.22 (21.59 to 22.83) | 23.02 (21.25 to 24.39) | 13.8 (13.32 to 14.26)  | 15.02 (13.89 to 15.96) | 35.96 (34.79 to 37.01) | 39.6 (37.47 to 41.27)  | 0.74 (0.72 to 0.76) | 0.77 (0.71 to 0.81) |
| 10   | 22.21 (21.51 to 22.88) | 23.62 (22.84 to 24.27) | 13.74 (13.2 to 14.3)   | 15.31 (14.72 to 15.87) | 35.87 (34.64 to 37.04) | 39.22 (38.08 to 40.19) | 0.74 (0.72 to 0.76) | 0.78 (0.76 to 0.8)  |

Figure A.2.1. Observed patient-reported outcomes. Mean scores with bootstrapped confidence Intervals. A higher score indicates a better health for each outcome measure.

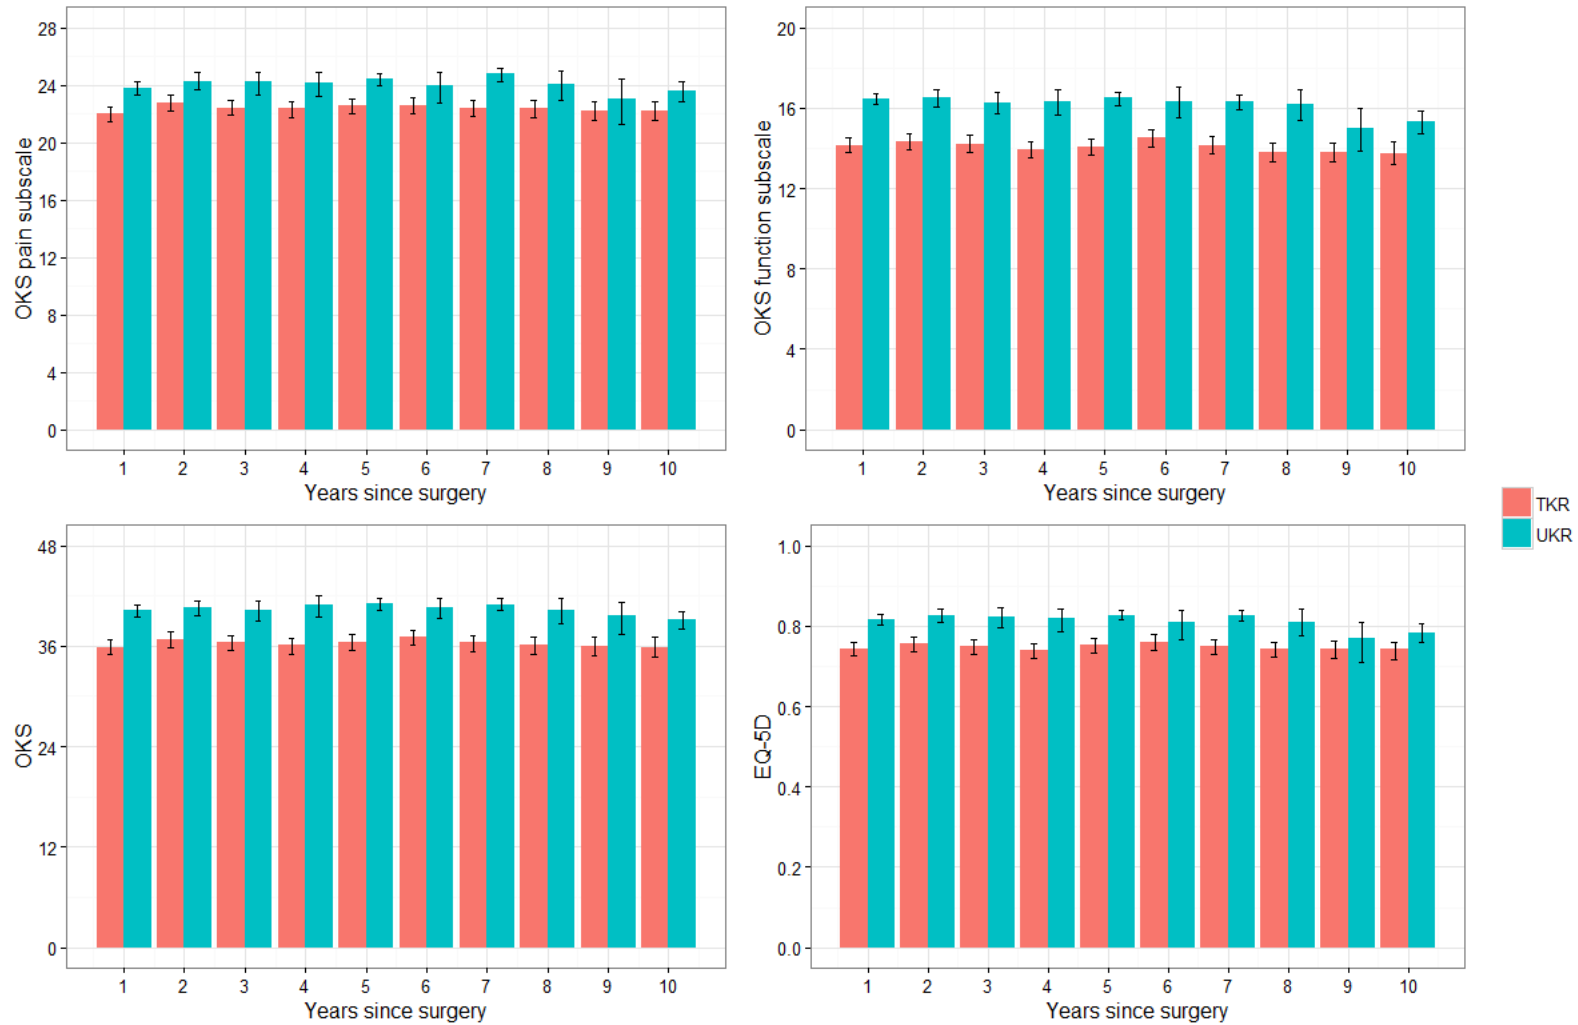

Figure A.2.2. Box plot of observed Oxford Knee Score of matched patients

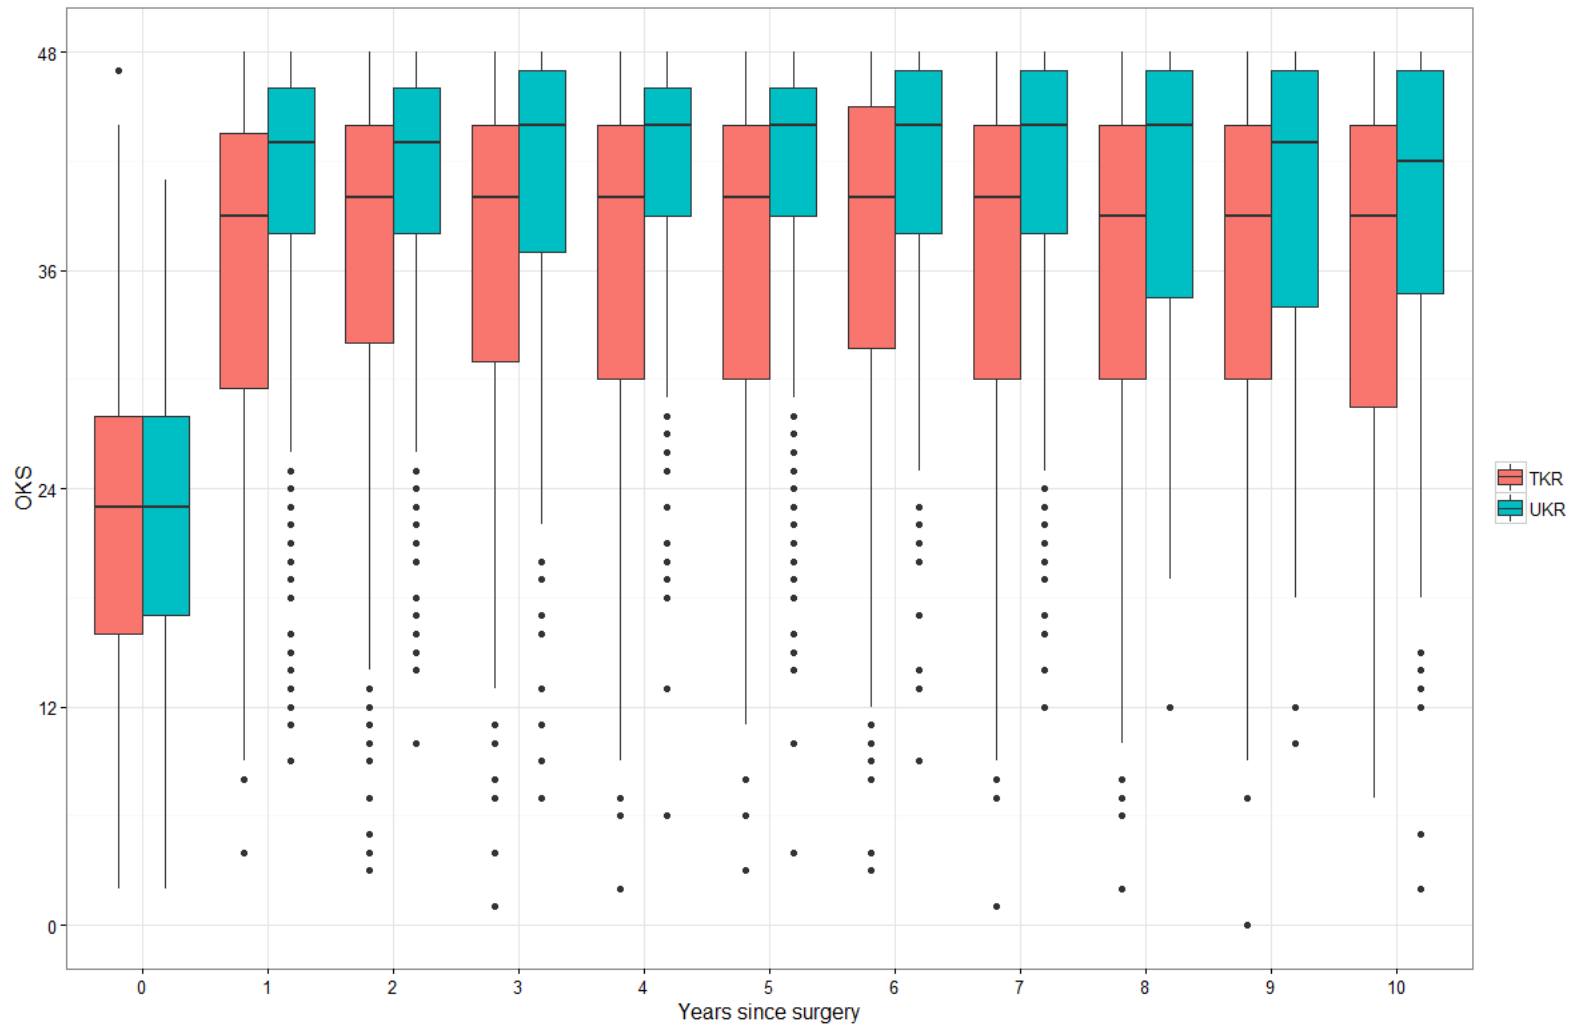

Figure A.2.3. Box plot of observed EQ-5D of matched patients

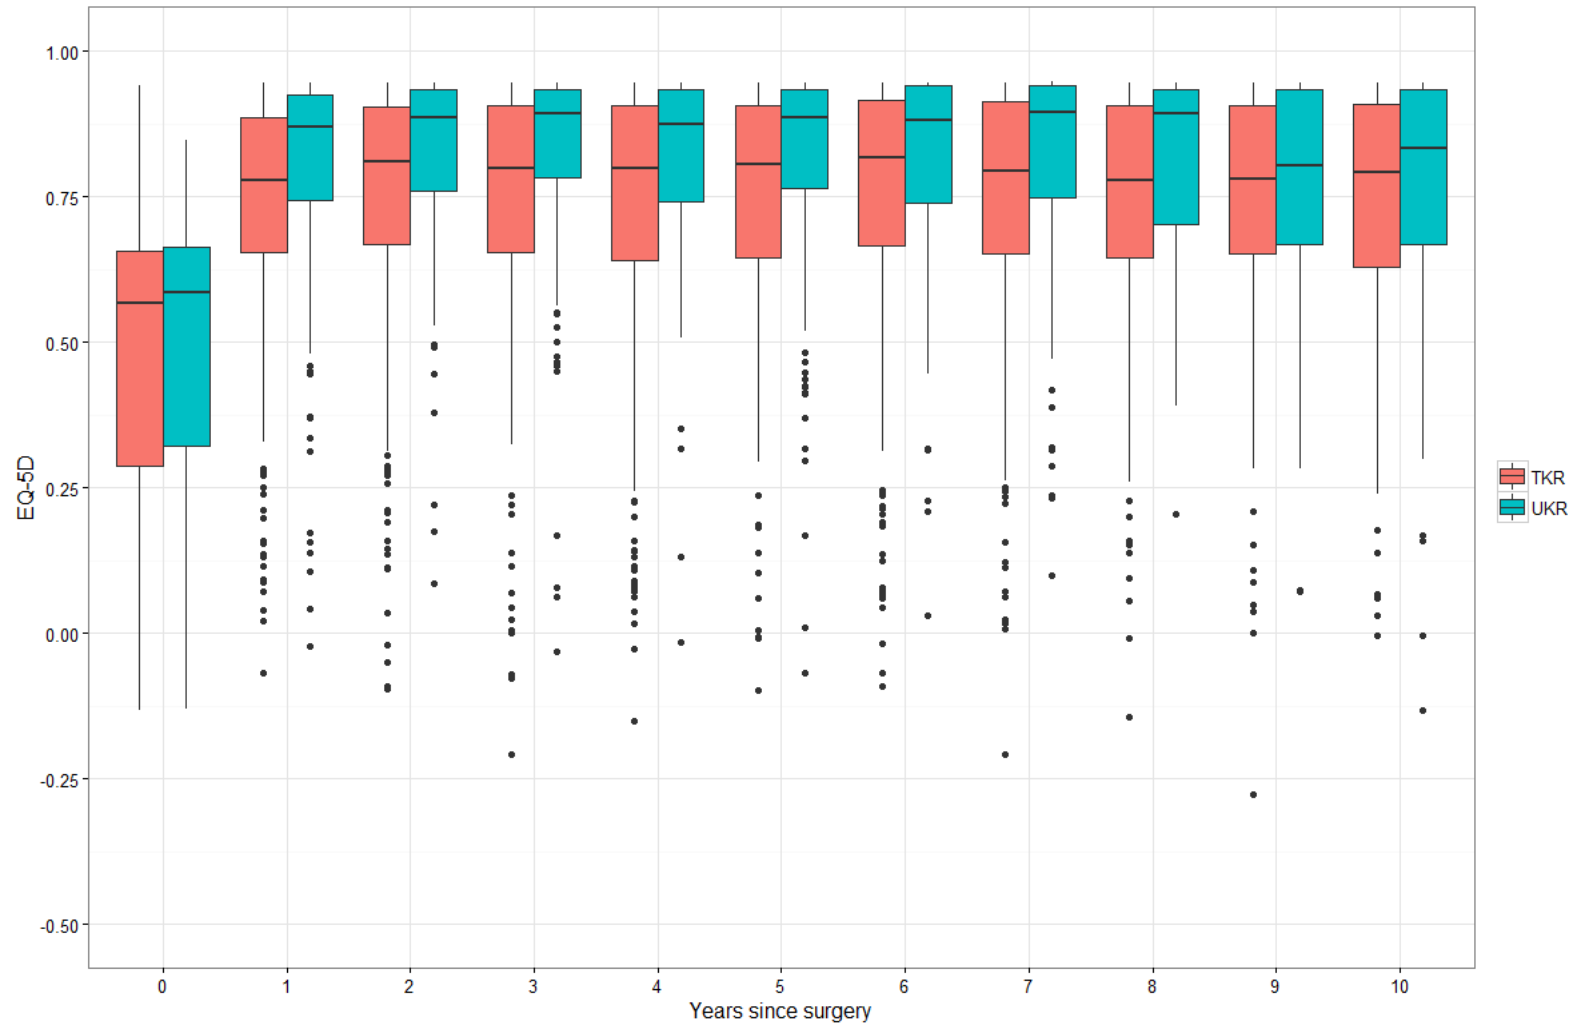



APPENDIX 3

Table A.3.1. Factors associated with Patient-reported outcome Scores over 10 years following surgery

|                                      | OKS pain component<br>(0 to 28)<br><i>Estimate (95% CI)</i> | OKS function component<br>(0 to 20)<br><i>Estimate (95% CI)</i> | OKS<br>(0 to 48)<br><i>Estimate (95% CI)</i> | EQ-5D<br>(-0.59 to 1)<br><i>Estimate (95% CI)</i> |
|--------------------------------------|-------------------------------------------------------------|-----------------------------------------------------------------|----------------------------------------------|---------------------------------------------------|
| Surgery (UKR)                        | 1.74<br>(1.14 – 2.35) ***                                   | 2.23<br>(1.82 – 2.65) ***                                       | 4.04<br>(3.07 – 5.01) ***                    | 0.073<br>(0.054 – 0.092) ***                      |
| Years since surgery                  | -0.09<br>(-0.12 – -0.05) ***                                | -0.11<br>(-0.14 – -0.09) ***                                    | -0.19<br>(-0.25 – -0.14) ***                 | -0.004<br>(-0.005 – -0.003) ***                   |
| Surgery (UKR)* Years since surgery   | 0.11<br>(0.05 – 0.17) ***                                   | 0.03<br>(-0.01 – 0.07)                                          | 0.13<br>(0.04 – 0.21) **                     | 0.002<br>(-0.000 – 0.003)                         |
| Age group                            |                                                             |                                                                 |                                              |                                                   |
| <60                                  | -1.26<br>(-2.02 – -0.50) **                                 | -0.27<br>(-0.79 – 0.25)                                         | -1.45<br>(-2.68 – -0.21) *                   | -0.031<br>(-0.055 – -0.008) **                    |
| 60 to 70                             | -                                                           | -                                                               | -                                            | -                                                 |
| 70 to 80                             | -0.46<br>(-1.10 – 0.18)                                     | -0.79<br>(-1.23 – -0.36) ***                                    | -1.38<br>(-2.41 – -0.34) **                  | -0.027<br>(-0.046 – -0.007) **                    |
| 80+                                  | 0.31<br>(-0.84 – 1.45)                                      | -0.97<br>(-1.76 – -0.18) *                                      | -0.75<br>(-2.62 – 1.11)                      | -0.024<br>(-0.059 – 0.011)                        |
| Gender (male)                        | -0.30<br>(-0.86 – 0.25)                                     | 0.19<br>(-0.20 – 0.58)                                          | -0.17<br>(-1.10 – 0.75)                      | 0.000<br>(-0.017 – 0.017)                         |
| Pre-operative OKS pain component     | 0.32<br>(0.26 – 0.37) ***                                   |                                                                 |                                              |                                                   |
| Pre-operative OKS function component |                                                             | 0.46<br>(0.41 – 0.51) ***                                       |                                              |                                                   |
| Pre-operative OKS                    |                                                             |                                                                 | 0.40<br>(0.35 – 0.46) ***                    |                                                   |
| Pre-operative EQ-5D                  |                                                             |                                                                 |                                              | 0.265<br>(0.226 – 0.304) ***                      |
| R2                                   | 0.762                                                       | 0.807                                                           | 0.805                                        | 0.773                                             |

\*  $p < .05$  \*\*  $p < .01$  \*\*\*  $p < .001$ . OKS: Oxford knee score; UKR: Unicompartmental knee replacement; TKR: Total knee replacement; CI: confidence intervals

APPENDIX 4

**Table A.4.1. Factors associated with patient-reported outcome scores at 1 year following surgery**

|                                      | OXS pain component<br>(0 to 28)<br><i>Estimate (95% CI)</i> | OXS function component<br>(0 to 20)<br><i>Estimate (95% CI)</i> | OXS<br>(0 to 48)<br><i>Estimate (95% CI)</i> | EQ-5D<br>(-0.59 to 1)<br><i>Estimate (95% CI)</i> |
|--------------------------------------|-------------------------------------------------------------|-----------------------------------------------------------------|----------------------------------------------|---------------------------------------------------|
| Surgery (UKR)                        | 1.62<br>(0.61 – 2.63) **                                    | 1.93<br>(1.26 – 2.61) ***                                       | 4.07<br>(2.58 – 5.57) ***                    | 0.06<br>(0.03 – 0.09) ***                         |
| Age group                            |                                                             |                                                                 |                                              |                                                   |
| <60                                  | -0.89<br>(-2.12 – 0.34)                                     | -0.20<br>(-1.03 – 0.63)                                         | -0.92<br>(-2.78 – 0.93)                      | -0.01<br>(-0.05 – 0.03)                           |
| 60 to 70                             | -                                                           | -                                                               | -                                            | -                                                 |
| 70 to 80                             | 0.40<br>(-0.79 – 1.58)                                      | 0.13<br>(-0.67 – 0.94)                                          | 0.49<br>(-1.36 – 2.34)                       | 0.02<br>(-0.02 – 0.05)                            |
| 80+                                  | 1.41<br>(-1.26 – 4.09)                                      | 0.80<br>(-1.02 – 2.62)                                          | 0.59<br>(-3.48 – 4.67)                       | 0.05<br>(-0.04 – 0.13)                            |
| Gender (male)                        | -0.48<br>(-1.48 – 0.52)                                     | 0.02<br>(-0.68 – 0.73)                                          | -0.62<br>(-2.19 – 0.96)                      | 0.01<br>(-0.03 – 0.04)                            |
| Pre-operative OXS pain component     | 0.35<br>(0.24 – 0.46) ***                                   |                                                                 |                                              |                                                   |
| Pre-operative OXS function component |                                                             | 0.44<br>(0.34 – 0.55) ***                                       |                                              |                                                   |
| Pre-operative OXS                    |                                                             |                                                                 | 0.38<br>(0.27 – 0.49) ***                    |                                                   |
| Pre-operative EQ-5D                  |                                                             |                                                                 |                                              | 0.23<br>(0.15 – 0.31) ***                         |
| R2                                   | 0.115                                                       | 0.226                                                           | 0.157                                        | 0.120                                             |

\*  $p < .05$  \*\*  $p < .01$  \*\*\*  $p < .001$ . OXS: Oxford knee score; UKR: Unicompartmental knee replacement; TKR: Total knee replacement; CI: confidence intervals

**Table A.4.2. Factors associated with patient-reported outcome scores at 10 years following surgery**

|                                      | OKS pain component<br>(0 to 28)<br><i>Estimate (95% CI)</i> | OKS function component<br>(0 to 20)<br><i>Estimate (95% CI)</i> | OKS<br>(0 to 48)<br><i>Estimate (95% CI)</i> | EQ-5D<br>(-0.59 to 1)<br><i>Estimate (95% CI)</i> |
|--------------------------------------|-------------------------------------------------------------|-----------------------------------------------------------------|----------------------------------------------|---------------------------------------------------|
| Surgery (UKR)                        | 1.67<br>(0.57 – 2.78) **                                    | 2.09<br>(1.27 – 2.91) ***                                       | 4.54<br>(2.90 – 6.18) ***                    | 0.07<br>(0.03 – 0.10) ***                         |
| Age group                            |                                                             |                                                                 |                                              |                                                   |
| <60                                  | -0.65<br>(-2.00 – 0.69)                                     | 0.30<br>(-0.70 – 1.31)                                          | -0.03<br>(-2.07 – 2.00)                      | -0.01<br>(-0.06 – 0.03)                           |
| 60 to 70                             | -                                                           | -                                                               | -                                            | -                                                 |
| 70 to 80                             | -1.12<br>(-2.42 – 0.17)                                     | -0.76<br>(-1.74 – 0.21)                                         | -1.83<br>(-3.86 – 0.20)                      | -0.05<br>(-0.09 – -0.01) *                        |
| 80+                                  | 0.55<br>(-2.38 – 3.48)                                      | -2.43<br>(-4.63 – -0.22) *                                      | -3.09<br>(-7.57 – 1.38)                      | -0.07<br>(-0.17 – 0.03)                           |
| Gender (male)                        | -0.09<br>(-1.18 – 1.01)                                     | 0.25<br>(-0.61 – 1.11)                                          | -0.21<br>(-1.94 – 1.52)                      | 0.01<br>(-0.03 – 0.04)                            |
| Pre-operative OKS pain component     | 0.39<br>(0.27 – 0.51) ***                                   |                                                                 |                                              |                                                   |
| Pre-operative OKS function component |                                                             | 0.56<br>(0.43 – 0.68) ***                                       |                                              |                                                   |
| Pre-operative OKS                    |                                                             |                                                                 | 0.47<br>(0.35 – 0.59) ***                    |                                                   |
| Pre-operative EQ-5D                  |                                                             |                                                                 |                                              | 0.29<br>(0.20 – 0.38) ***                         |
| R2                                   | 0.105                                                       | 0.231                                                           | 0.170                                        | 0.135                                             |

\*  $p < .05$  \*\*  $p < .01$  \*\*\*  $p < .001$ . OKS: Oxford knee score; UKR: Unicompartmental knee replacement; TKR: Total knee replacement; CI: confidence intervals

APPENDIX 5

**Table A.5.1. Factors associated with successful patient-reported outcomes over 10 years following surgery**

|                                | <i>OKS categories</i>         |                               |                                     | <i>Change in OKS</i>          |                               | <i>Change in EQ-5D</i>        |                               |
|--------------------------------|-------------------------------|-------------------------------|-------------------------------------|-------------------------------|-------------------------------|-------------------------------|-------------------------------|
|                                | 'Excellent' (>41)             | 'Excellent' or 'good' (>34)   | 'Excellent', 'good' or 'fair' (>27) | Achieve MCID (≥4)             | No change or improvement (≥0) | Achieve MCID (≥0.074)         | No change or improvement (≥0) |
| Surgery (UKR)                  | 4.57<br>(3.20 – 6.54) **<br>* | 3.81<br>(2.47 – 5.87) **<br>* | 3.49<br>(2.05 – 5.95) **<br>*       | 2.87<br>(1.77 – 4.66) **<br>* | 3.03<br>(1.66 – 5.54) **<br>* | 2.49<br>(1.63 – 3.80) **<br>* | 2.10<br>(1.24 – 3.56) **      |
| Years since surgery            | 1.00<br>(0.96 – 1.04)         | 0.91<br>(0.87 – 0.96) **<br>* | 0.91<br>(0.86 – 0.97) **            | 0.94<br>(0.89 – 1.00)         | 0.99<br>(0.92 – 1.07)         | 0.94<br>(0.89 – 0.99) *       | 0.91<br>(0.85 – 0.97) **      |
| Age group                      |                               |                               |                                     |                               |                               |                               |                               |
| <60                            | 0.77<br>(0.42 – 1.40)         | 0.42<br>(0.21 – 0.87) *       | 0.32<br>(0.14 – 0.77) *             | 0.28<br>(0.12 – 0.65) **      | 0.36<br>(0.13 – 0.96) *       | 0.36<br>(0.17 – 0.77) **      | 0.21<br>(0.09 – 0.53) **      |
| 60 to 70                       |                               |                               |                                     |                               |                               |                               |                               |
| 70 to 80                       | 0.93<br>(0.56 – 1.54)         | 1.09<br>(0.58 – 2.04)         | 1.15<br>(0.52 – 2.56)               | 1.17<br>(0.56 – 2.44)         | 2.31<br>(0.91 – 5.88)         | 1.08<br>(0.57 – 2.04)         | 1.21<br>(0.53 – 2.80)         |
| 80+                            | 1.08<br>(0.43 – 2.70)         | 1.28<br>(0.40 – 4.07)         | 0.87<br>(0.21 – 3.66)               | 0.87<br>(0.25 – 3.06)         | 1.13<br>(0.21 – 6.13)         | 0.59<br>(0.20 – 1.79)         | 0.62<br>(0.15 – 2.63)         |
| Years since surgery * <60      | 1.03<br>(0.96 – 1.10)         | 1.09<br>(1.00 – 1.18) *       | 1.11<br>(1.01 – 1.23) *             | 1.16<br>(1.04 – 1.29) **      | 1.06<br>(0.94 – 1.21)         | 1.14<br>(1.03 – 1.26) *       | 1.22<br>(1.08 – 1.38) **      |
| Years since surgery * 60 to 70 |                               |                               |                                     |                               |                               |                               |                               |
| Years since surgery * 70 to 80 | 0.91<br>(0.86 – 0.97) **      | 0.91<br>(0.85 – 0.98) *       | 0.92<br>(0.84 – 1.02)               | 0.92<br>(0.84 – 1.01)         | 0.83<br>(0.73 – 0.93) **      | 0.89<br>(0.82 – 0.97) **      | 0.90<br>(0.81 – 1.00)         |
| Years since surgery * 80+      | 0.86<br>(0.76 – 0.98) *       | 0.91<br>(0.79 – 1.05)         | 0.98<br>(0.82 – 1.18)               | 0.89<br>(0.75 – 1.04)         | 0.94<br>(0.74 – 1.20)         | 0.96<br>(0.83 – 1.13)         | 0.98<br>(0.80 – 1.20)         |
| Gender (male)                  | 1.11<br>(0.77 – 1.61)         | 0.91<br>(0.58 – 1.43)         | 0.84<br>(0.49 – 1.44)               | 0.78<br>(0.47 – 1.28)         | 0.67<br>(0.36 – 1.22)         | 0.96<br>(0.62 – 1.47)         | 0.91<br>(0.54 – 1.55)         |

|                     |                               |                               |                               |                               |                          |                               |                               |
|---------------------|-------------------------------|-------------------------------|-------------------------------|-------------------------------|--------------------------|-------------------------------|-------------------------------|
| Pre-operative OKS   | 1.13<br>(1.11 – 1.16) **<br>* | 1.14<br>(1.11 – 1.17) **<br>* | 1.15<br>(1.11 – 1.19) **<br>* | 0.94<br>(0.91 – 0.97) **<br>* | 0.93<br>(0.90 – 0.97) ** |                               |                               |
| Pre-operative EQ-5D |                               |                               |                               |                               |                          | 0.01<br>(0.00 – 0.04) **<br>* | 0.04<br>(0.01 – 0.16) **<br>* |

---

\*\* p<.01 \*\*\* p<.001. OR: Odds ratio (OR) based on mixed effects logistic regression controlling for years since surgery, age group, gender and pre-operative scores (Appendix 4). Kalairajah OKS categories are based on absolute scores while change in OKS and EQ-5D compare patients' post-operative scores with their pre-operative score. Minimally clinically important difference; MCID: OKS: Oxford knee score; UKR: Unicompartmental knee replacement; CI: confidence intervals.

APPENDIX 6

**Table A.6.1. Patient characteristics before and after matching with no caliper specified**

|                                      | Before matching    |                     |                              | After matching      |                     |                              |
|--------------------------------------|--------------------|---------------------|------------------------------|---------------------|---------------------|------------------------------|
|                                      | TKR                | UKR                 | Standardised Mean Difference | TKR                 | UKR                 | Standardised Mean Difference |
| N                                    | 1,980              | 675                 |                              | 675                 | 675                 |                              |
| Age (mean, SD)                       | 70.4 (8.17)        | 66.82 (9.56)        | 0.4                          | 67.42 (8.41)        | 66.82 (9.56)        | 0.07                         |
| Gender: male (n, %)                  | 864 (44%)          | 350 (52%)           | 0.17                         | 318 (47%)           | 350 (52%)           | 0.09                         |
| Pre-op OKS pain score (mean, SD)     | 9.61 (4.62)        | 12.63 (5.17)        | 0.62                         | 11.8 (4.86)         | 12.63 (5.17)        | 0.17                         |
| Pre-op OKS function score (mean, SD) | 8.57 (3.51)        | 11.95 (4.05)        | 0.89                         | 11.14 (3.47)        | 11.95 (4.05)        | 0.21                         |
| Pre-op OKS total score (mean, SD)    | 18.18 (7.5)        | 24.59 (8.69)        | 0.79                         | 22.93 (7.71)        | 24.59 (8.69)        | 0.2                          |
| Pre-op EQ5D baseline (median, IQR)   | 0.43 (0.16 to 0.6) | 0.61 (0.37 to 0.68) | 0.62                         | 0.58 (0.34 to 0.66) | 0.61 (0.37 to 0.68) | 0.13                         |

TKR: total knee replacement, UKR: unicompartmental knee replacement. IQR: interquartile range. Standardised Mean Difference compares the difference in means in units of the pooled standard deviation.

**Table A.6.2. Effect of patient and surgical factors on patient-reported outcome measures over 10 years following surgery after matching with no caliper specified**

|                                      | OKS pain component<br>(0 to 28)<br><i>Estimate (95% CI)</i> | OKS function component<br>(0 to 20)<br><i>Estimate (95% CI)</i> | OKS<br>(0 to 48)<br><i>Estimate (95% CI)</i> | EQ-5D<br>(-0.59 to 1)<br><i>Estimate (95% CI)</i> |
|--------------------------------------|-------------------------------------------------------------|-----------------------------------------------------------------|----------------------------------------------|---------------------------------------------------|
| Surgery (UKR)                        | 1.40<br>(0.85 – 1.94) ***                                   | 1.94<br>(1.57 – 2.31) ***                                       | 3.34<br>(2.47 – 4.21) ***                    | 0.06<br>(0.04 – 0.08) ***                         |
| Years since surgery                  | -0.09<br>(-0.13 – -0.06) ***                                | -0.13<br>(-0.15 – -0.10) ***                                    | -0.22<br>(-0.27 – -0.17) ***                 | -0.00<br>(-0.01 – -0.00) ***                      |
| Surgery (UKR)* Years since surgery   | 0.12<br>(0.07 – 0.17) ***                                   | 0.05<br>(0.01 – 0.08) **                                        | 0.16<br>(0.09 – 0.24) ***                    | 0.00<br>(0.00 – 0.00) **                          |
| Age group                            |                                                             |                                                                 |                                              |                                                   |
| <60                                  | -1.05<br>(-1.72 – -0.39) **                                 | -0.24<br>(-0.69 – 0.21)                                         | -1.19<br>(-2.27 – -0.12) *                   | -0.02<br>(-0.04 – -0.00) *                        |
| 60 to 70                             | -                                                           | -                                                               | -                                            | -                                                 |
| 70 to 80                             | -0.63<br>(-1.20 – -0.05) *                                  | -0.80<br>(-1.18 – -0.41) ***                                    | -1.46<br>(-2.39 – -0.53) **                  | -0.03<br>(-0.05 – -0.01) **                       |
| 80+                                  | 0.35<br>(-0.75 – 1.44)                                      | -0.87<br>(-1.61 – -0.14) *                                      | -0.62<br>(-2.38 – 1.14)                      | -0.02<br>(-0.06 – 0.01)                           |
| Gender (male)                        | -0.11<br>(-0.62 – 0.39)                                     | 0.38<br>(0.04 – 0.73) *                                         | 0.23<br>(-0.60 – 1.06)                       | 0.01<br>(-0.01 – 0.02)                            |
| Pre-operative OKS pain component     | 0.28<br>(0.23 – 0.33) ***                                   |                                                                 |                                              |                                                   |
| Pre-operative OKS function component |                                                             | 0.41<br>(0.36 – 0.45) ***                                       |                                              |                                                   |
| Pre-operative OKS                    |                                                             |                                                                 | 0.35<br>(0.30 – 0.41) ***                    |                                                   |
| Pre-operative EQ-5D                  |                                                             |                                                                 |                                              | 0.24<br>(0.21 – 0.28) ***                         |
| R2                                   | 0.743                                                       | 0.793                                                           | 0.785                                        | 0.753                                             |

\*  $p < .05$  \*\*  $p < .01$  \*\*\*  $p < .001$ . OKS: Oxford knee score; EQ-5D: EuroQol 5 domain questionnaire; UKR: Unicompartmental knee replacement; TKR: Total knee replacement; CI: confidence intervals

APPENDIX 7

**Table A.7.1. Patient characteristics before and after matching with only KAT knees done by a consultant or associate specialist/ staff grade included in the analysis**

|                                      | Before matching    |                     |                              | After matching      |                     |                              |
|--------------------------------------|--------------------|---------------------|------------------------------|---------------------|---------------------|------------------------------|
|                                      | TKR                | UKR                 | Standardised Mean Difference | TKR                 | UKR                 | Standardised Mean Difference |
| N                                    |                    | 1,428               | 675                          |                     | 564                 | 564                          |
| Age (mean, SD)                       | 70.25 (8.37)       | 66.82 (9.56)        | 0.38                         | 67.76 (8.79)        | 67.8 (9.13)         | 0                            |
| Gender: male (n, %)                  | 624 (44%)          | 350 (52%)           | 0.16                         | 257 (46%)           | 280 (50%)           | 0.08                         |
| Pre-op OKS pain score (mean, SD)     | 9.61 (4.62)        | 12.63 (5.17)        | 0.62                         | 11.28 (5.05)        | 11.72 (4.81)        | 0.09                         |
| Pre-op OKS function score (mean, SD) | 8.59 (3.48)        | 11.95 (4.05)        | 0.89                         | 10.61 (3.53)        | 10.98 (3.61)        | 0.1                          |
| Pre-op OKS total score (mean, SD)    | 18.19 (7.48)       | 24.59 (8.69)        | 0.79                         | 21.89 (7.97)        | 22.72 (7.9)         | 0.1                          |
| Pre-op EQ5D baseline (median, IQR)   | 0.42 (0.17 to 0.6) | 0.61 (0.37 to 0.68) | 0.62                         | 0.56 (0.28 to 0.65) | 0.58 (0.31 to 0.66) | 0.08                         |

TKR: total knee replacement, UKR: unicompartmental knee replacement. IQR: interquartile range. Standardised Mean Difference compares the difference in means in units of the pooled standard deviation.



**Table A.7.2. Effect of patient and surgical factors on patient-reported outcome measures over 10 years following surgery after matching with only KAT knees done by a consultant or associate specialist/ staff grade included in the analysis**

|                                      | OXS pain component<br>(0 to 28)<br><i>Estimate (95% CI)</i> | OXS function component<br>(0 to 20)<br><i>Estimate (95% CI)</i> | OXS<br>(0 to 48)<br><i>Estimate (95% CI)</i> | EQ-5D<br>(-0.59 to 1)<br><i>Estimate (95% CI)</i> |
|--------------------------------------|-------------------------------------------------------------|-----------------------------------------------------------------|----------------------------------------------|---------------------------------------------------|
| Surgery (UKR)                        | 1.75<br>(1.13 – 2.37) ***                                   | 2.16<br>(1.75 – 2.58) ***                                       | 3.87<br>(2.89 – 4.85) ***                    | 0.07<br>(0.05 – 0.09) ***                         |
| Years since surgery                  | -0.06<br>(-0.10 – -0.03) **                                 | -0.12<br>(-0.14 – -0.09) ***                                    | -0.18<br>(-0.24 – -0.13) ***                 | -0.00<br>(-0.01 – -0.00) ***                      |
| Surgery (UKR)* Years since surgery   | 0.08<br>(0.02 – 0.14) *                                     | 0.03<br>(-0.01 – 0.07)                                          | 0.11<br>(0.02 – 0.19) *                      | 0.00<br>(-0.00 – 0.00)                            |
| Age group                            |                                                             |                                                                 |                                              |                                                   |
| <60                                  | -1.24<br>(-2.02 – -0.46) **                                 | -0.30<br>(-0.82 – 0.23)                                         | -1.45<br>(-2.71 – -0.19) *                   | -0.03<br>(-0.06 – -0.01) **                       |
| 60 to 70                             | -                                                           | -                                                               | -                                            | -                                                 |
| 70 to 80                             | -0.73<br>(-1.38 – -0.08) *                                  | -0.99<br>(-1.43 – -0.56) ***                                    | -1.80<br>(-2.84 – -0.75) **                  | -0.04<br>(-0.06 – -0.02) **                       |
| 80+                                  | -0.87<br>(-1.97 – 0.22)                                     | -1.45<br>(-2.18 – -0.71) ***                                    | -2.46<br>(-4.22 – -0.69) **                  | -0.06<br>(-0.10 – -0.03) ***                      |
| Gender (male)                        | -0.57<br>(-1.15 – 0.00)                                     | 0.08<br>(-0.31 – 0.48)                                          | -0.59<br>(-1.53 – 0.35)                      | -0.00<br>(-0.02 – 0.01)                           |
| Pre-operative OXS pain component     | 0.32<br>(0.26 – 0.38) ***                                   |                                                                 |                                              |                                                   |
| Pre-operative OXS function component |                                                             | 0.47<br>(0.41 – 0.52) ***                                       |                                              |                                                   |
| Pre-operative OXS                    |                                                             |                                                                 | 0.41<br>(0.35 – 0.47) ***                    |                                                   |
| Pre-operative EQ-5D                  |                                                             |                                                                 |                                              | 0.26<br>(0.22 – 0.30) ***                         |
| R2                                   | 0.751                                                       | 0.803                                                           | 0.795                                        | 0.774                                             |

\*  $p < .05$  \*\*  $p < .01$  \*\*\*  $p < .001$ . OXS: Oxford knee score; EQ-5D: EuroQol 5 domain questionnaire; UKR: Unicompartmental knee replacement; TKR: Total knee replacement; CI: confidence intervals
